# Supplementary material for: Assessment of Video Capsule Endoscopy in the Management of Acute Gastrointestinal Bleeding During the COVID-19 Pandemic
Source: PubMed Central journal article supplement (PMC8325069; doi:10.1001/jamanetworkopen.2021.18796), 2021-07-30
Supplement: jamanetwopen-e2118796-s001.pdf [file jamanetwopen-e2118796-s001.pdf]

## Supplementary Online Content

Hakimian S, Raines D, Reed G, et al. Assessment of video capsule endoscopy in the management of acute gastrointestinal bleeding during the COVID-19 pandemic. *JAMA Netw Open*. 2021;4(7):e2118796. doi:10.1001/jamanetworkopen.2021.18796

**eTable 1.** Full List of Baseline Characteristics

**eTable 2.** Match Variables in Matched Populations

**eTable 3.** Secondary Analysis of Primary Outcome

This supplementary material has been provided by the authors to give readers additional information about their work.

| <b>eTable 1. Full list of baseline characteristics</b>      |                         |                       |
|-------------------------------------------------------------|-------------------------|-----------------------|
|                                                             | <b>Covid<br/>(n=74)</b> | <b>SOC<br/>(n=72)</b> |
| Age, mean (SD), y                                           | 64.9 (14.1)             | 61.3<br>(13.4)        |
| <b>Sex</b>                                                  |                         |                       |
| Male                                                        | 45 (61)                 | 47 (65)               |
| Female                                                      | 29 (39)                 | 25 (35)               |
| <b>Race/ethnicity</b>                                       |                         |                       |
| Caucasian                                                   | 49 (66)                 | 40 (56)               |
| African American                                            | 12 (16)                 | 16 (22)               |
| Hispanic                                                    | 4 (5)                   | 6 (8)                 |
| Other                                                       | 9 (12)                  | 10 (14)               |
| <b>Comorbidities</b>                                        |                         |                       |
| COPD                                                        | 13 (18)                 | 12 (17)               |
| Congestive heart failure *                                  | 23 (31)                 | 12 (17)               |
| Coronary artery disease                                     | 27 (36)                 | 24 (33)               |
| Cirrhosis                                                   | 13 (17)                 | 17 (24)               |
| End-stage renal disease                                     | 5 (7)                   | 4 (6)                 |
| Severe Aortic stenosis                                      | 2 (3)                   | 1 (1)                 |
| Diabetes                                                    | 28 (38)                 | 25 (35)               |
| <b>Other conditions treated during same hospitalization</b> |                         |                       |
| Acute respiratory failure                                   | 14 (19)                 | 10 (14)               |
| Acute renal failure                                         | 18 (24)                 | 12 (17)               |
| Sepsis                                                      | 8 (11)                  | 7 (10)                |
| Pneumonia                                                   | 8 (11)                  | 5 (7)                 |
| Hypoxemia                                                   | 23 (31)                 | 22 (31)               |
| <b>ASA class</b>                                            |                         |                       |
| 1                                                           | 1 (1)                   | 1 (1)                 |
| 2                                                           | 11 (15)                 | 7 (10)                |
| 3                                                           | 51 (69)                 | 48 (67)               |
| 4                                                           | 11 (15)                 | 16 (22)               |
| <b>Medication use</b>                                       |                         |                       |
| NSAID use                                                   | 9 (12)                  | 14 (20)               |
| Aspirin                                                     | 33 (45)                 | 27 (38)               |
| Heparin                                                     | 2 (3)                   | 2 (3)                 |
| P2Y12 inhibitors                                            | 10 (14)                 | 8 (11)                |
| Warfarin                                                    | 14 (19)                 | 8 (11)                |
| Direct oral anticoagulants                                  | 10 (14)                 | 4 (6)                 |
| No anticoagulation                                          | 33 (45)                 | 39 (54)               |

|                                     |            |            |
|-------------------------------------|------------|------------|
| Baseline HGB (mg/dl), mean (SD)     | 10.5 (2.6) | 11.3 (2.4) |
| INR>2                               | 14 (19)    | 6 (9)      |
| BUN/cr>20                           | 48 (65)    | 44 (61)    |
| Glasgow-Blatchford Score, mean (SD) | 8.4 (2.4)  | 7.6 (2.9)  |
| <b>Presenting symptom</b>           |            |            |
| Hematemesis                         | 8 (11)     | 11 (15)    |
| Melena                              | 35 (47)    | 27 (38)    |
| Hematochezia *                      | 3 (4)      | 16 (22)    |
| Anemia                              | 28 (38)    | 18 (25)    |
| Presenting with GI bleeding         | 51 (69)    | 53 (74)    |

Abbreviations: SOC, standard of care; COPD, chronic obstructive pulmonary disease, pRBC, packed red blood cell; NSAID, non-steroidal anti-inflammatory drugs; HGB, hemoglobin, INR, international normalized ratio.

**eTable 2: Match Variables in matched population**

| variable                | COVID<br>(N =54) |        | SOC<br>(N =54) |        | Std. Diff. |
|-------------------------|------------------|--------|----------------|--------|------------|
|                         | Mean             | ±SD    | Mean           | ±SD    |            |
| Age                     | 61.46            | ±13.75 | 62.78          | ±12.70 | -.099      |
| GBS                     | 8.04             | ±2.35  | 8.28           | ±2.43  | -0.101     |
|                         |                  |        |                |        |            |
|                         | N                | (%)    | N              | (%)    |            |
| <u>Gender</u>           |                  |        |                |        | -0.077     |
| Male                    | 36               | (66.7) | 34             | (63.0) |            |
| Female                  | 18               | (33.3) | 20             | (37.0) |            |
|                         |                  |        |                |        |            |
| <u>Caucasian</u>        |                  |        |                |        | -0.074     |
| no                      | 24               | (44.4) | 22             | (40.7) |            |
| yes                     | 30               | (55.6) | 32             | (59.3) |            |
|                         |                  |        |                |        |            |
| <u>African American</u> |                  |        |                |        | 0.000      |
| no                      | 43               | (79.6) | 43             | (79.6) |            |
| yes                     | 11               | (20.4) | 11             | (20.4) |            |
|                         |                  |        |                |        |            |
| <u>Hispanic</u>         |                  |        |                |        | 0.000      |
| no                      | 50               | (92.6) | 50             | (92.6) |            |
| yes                     | 4                | (7.4)  | 4              | (7.4)  |            |
|                         |                  |        |                |        |            |
| <u>Other</u>            |                  |        |                |        | 0.103      |
| no                      | 45               | (83.3) | 47             | (87.0) |            |
| yes                     | 9                | (16.7) | 7              | (13.0) |            |
|                         |                  |        |                |        |            |
| <u>Hematemesis</u>      |                  |        |                |        | 0.053      |
| no                      | 46               | (85.2) | 47             | (87.0) |            |
| yes                     | 8                | (14.8) | 7              | (13.0) |            |
|                         |                  |        |                |        |            |
| <u>Melena</u>           |                  |        |                |        | 0.073      |
| no                      | 25               | (46.3) | 27             | (50.0) |            |
| yes                     | 29               | (53.7) | 27             | (50.0) |            |
|                         |                  |        |                |        |            |
| <u>Hematochezia</u>     |                  |        |                |        | 0.000      |
| no                      | 51               | (94.4) | 51             | (94.4) |            |
| yes                     | 3                | (5.6)  | 3              | (5.6)  |            |
|                         |                  |        |                |        |            |
| <u>Anemia</u>           |                  |        |                |        | -0.122     |
| no                      | 40               | (74.1) | 37             | (68.5) |            |
| yes                     | 14               | (25.9) | 17             | (31.5) |            |

|                                   | COVID   |        | SOC     |        |            |
|-----------------------------------|---------|--------|---------|--------|------------|
| variable                          | (N =54) |        | (N =54) |        | Std. Diff. |
| <u>Cirrhosis/Liver fail.</u>      |         |        |         |        | 0.000      |
| no                                | 41      | (75.9) | 41      | (75.9) |            |
| yes                               | 13      | (24.1) | 13      | (24.1) |            |
| <u>ESRD</u>                       |         |        |         |        | 0.000      |
| no                                | 50      | (92.6) | 51      | (94.4) |            |
| yes                               | 4       | (7.4)  | 3       | (5.6)  |            |
| <u>NSAID use</u>                  |         |        |         |        | -0.099     |
| no                                | 46      | (85.2) | 44      | (81.5) |            |
| yes                               | 8       | (14.8) | 10      | (18.5) |            |
| <u>Aspirin</u>                    |         |        |         |        | -0.037     |
| no                                | 32      | (59.3) | 31      | (57.4) |            |
| yes                               | 22      | (40.7) | 23      | (42.6) |            |
| <u>P2Y12</u>                      |         |        |         |        | 0.056      |
| no                                | 47      | (87.0) | 48      | (88.9) |            |
| yes                               | 7       | (13.0) | 6       | (11.1) |            |
| <u>Warfarin</u>                   |         |        |         |        | 0.152      |
| no                                | 44      | (81.5) | 47      | (87.0) |            |
| yes                               | 10      | (18.5) | 7       | (13.0) |            |
| <u>Direct Oral anticoagulants</u> |         |        |         |        | 0.200      |
| no                                | 48      | (88.9) | 51      | (94.4) |            |
| yes                               | 6       | (11.1) | 3       | (5.6)  |            |
| <u>Heparin</u>                    |         |        |         |        | 0.000      |
| no                                | 53      | (98.1) | 53      | (98.1) |            |
| yes                               | 1       | (1.9)  | 1       | (1.9)  |            |
| <u>No Anti-Coagulant</u>          |         |        |         |        | -0.037     |
| no                                | 28      | (51.9) | 27      | (50.0) |            |
| yes                               | 26      | (48.1) | 27      | (50.0) |            |

eTable 3- secondary analysis of primary outcome

| Active Bleeding Visualized Models                           | Odds Ratio (COVID vs SOC) | 95% Confidence Interval |
|-------------------------------------------------------------|---------------------------|-------------------------|
| Full population, MV adjusted <sup>1</sup>                   | 5.23                      | 2.23, 12.27             |
| Full population on common support, MV adjusted <sup>1</sup> | 5.08                      | 2.12, 12.16             |
| Matched Population                                          | 4.59                      | 2.00, 10.49             |
| Matched Population, adjusted for imbalance <sup>2</sup>     | 4.75                      | 2.02, 11.14             |

1: adjusted for gender, age, race, GBS, NSAID use, aspirin, Warfarin, direct oral anti-coagulants, no anti-coagulation, cirrhosis, ESRD, presenting symptoms

2: Warfarin, direct oral anti-coagulants
